# Supplementary material for: Iron-catalyzed hydrosilylation of CO2: CO2 conversion to formamides and methylamines
Source: Royal Society of Chemistry journal article supplement (doi:10.1039/c4cy00130c), 2014-01-01
Supplement: c4cy00130c1.pdf [file c4cy00130c1.pdf]

SUPPORTING INFORMATION FOR

**Iron–catalyzed hydrosilylation of CO<sub>2</sub>:  
CO<sub>2</sub> conversion to formamides and methylamines**

*Xavier Frogneux, Olivier Jacquet and Thibault Cantat\**

CEA, IRAMIS, SIS2M, F-91191 Gif-sur-Yvette France.

CNRS, UMR SIS2M n° 3299 CEA – CNRS, F-91191 Gif-sur-Yvette France.

E-mail: [thibault.cantat@cea.fr](mailto:thibault.cantat@cea.fr)

## Experimental details

### *General considerations*

All reactions and manipulations were performed at 20 °C in a recirculating mBraun LabMaster DP inert atmosphere (Ar) drybox and vacuum Schlenk lines. Glassware was dried overnight at 60 °C before use. All NMR spectra were obtained using a Bruker DPX 200 MHz spectrometer. Chemical shifts for  $^1\text{H}$  and  $^{13}\text{C}\{^1\text{H}\}$  NMR spectra were referenced to solvent impurities. Mass spectrometer data were collected on a Shimadzu GCMS-QP2010 Ultra gas chromatograph mass spectrometer equipped with a Supelco SLB<sup>TM</sup>-ms fused silica capillary column (30 m x 0.25 mm x 0.25  $\mu\text{m}$ ). Unless otherwise noted, reagents were purchased from commercial suppliers and dried over 4 Å molecular sieves prior to use. Celite (Aldrich), alumina (Brockman I, Aldrich) and 4 Å molecular sieves (Aldrich) were dried under dynamic vacuum at 250 °C for 48 h prior to use. Tetrahydrofuran (THF), 1,4-dioxane and toluene were dried over a sodium(0)/benzophenone mixture and distilled before use. Acetonitrile, dichloromethane were dried over  $\text{CaH}_2$  and distilled before use.  $\text{Fe}(\text{acac})_2$  was purchased from Sigma-Aldrich with 99.95 % trace metal basis. Carbon dioxide was purchased from Messer in a 5.5 purity gas bottle.

### *Typical procedure for the catalytic formylation of amines to formamides:*

The typical procedure is detailed for the conversion of *N*-methylaniline (**1a**) to *N*-methylformanilide (**2a**) using  $\{\text{Fe}(\text{acac})_2 + \text{PP}_3\}$  as catalyst. Under inert atmosphere (Ar), A 16 mL J. Young Schlenk flask, equipped with a magnetic stir bar and a J. Young valve, is charged successively with a solution of  $\text{Fe}(\text{acac})_2$  (3.2 mg, 0.0125 mmol) and  $\text{PP}_3$  (8.4 mg, 0.0125 mmol) in 0.7 mL of anhydrous THF, *N*-methylaniline (**1a**) (27  $\mu\text{L}$ , 0.250 mmol), and phenylsilane (31.0  $\mu\text{L}$ , 0.250 mmol). The reaction mixture is exposed to a  $\text{CO}_2$  atmosphere (1 bar) and the flask is sealed and stirred vigorously at RT for 18 h. The corresponding *N*-

methylformanilide (**2a**) is identified and the yield and conversion were determined by  $^1\text{H}$  NMR in  $\text{CDCl}_3$  and GC/MS using mesitylene as an internal standard, after calibration.

Procedure for the isolation of **2a**: the crude mixture is quenched with ethyl acetate (5 mL), filtered through Celite, concentrated under vacuo and purified by flash chromatography on silica gel (0.069-0.200 mm), standard grade using *n*-pentane:ethyl acetate (80:20) as the eluent. After removal of the solvent under reduced pressure, this method afforded analytically pure **2a** as colorless oil. Average isolated yield over two runs: 92 %, 62.2 mg.

### ***Typical procedure for the catalytic methylation of amines:***

The typical procedure is detailed for the conversion of *N*-methylaniline (**1a**) to *N*-methylformanilide (**2a**) using  $\{\text{Fe}(\text{acac})_2 + \text{PP}_3\}$  as catalyst. Under inert atmosphere (Ar), A 16 mL J. Young Schlenk flask, equipped with a magnetic stir bar and a J. Young valve, is charged successively with a solution of  $\text{Fe}(\text{acac})_2$  (1.6 mg) and  $\text{PP}_3$  (4.2 mg) in 0.35 mL of anhydrous THF, *N*-methylaniline (**1a**) (13.5  $\mu\text{L}$ , 0.125 mmol), and phenylsilane (62.0  $\mu\text{L}$ , 0.5 mmol). The reaction mixture is exposed to a  $\text{CO}_2$  atmosphere (1 bar) and the flask is sealed and stirred vigorously in an oil bath at 100  $^\circ\text{C}$  for 18 h. The corresponding *N,N*-dimethylaniline (**2a**) is identified and the yield and conversion were determined by  $^1\text{H}$  NMR in  $\text{CDCl}_3$  and GC/MS using mesitylene as an internal standard, after calibration.

### ***Iron-catalyzed hydrosilylation of 2a to 3a:***

Under inert atmosphere (Ar), A 16 mL J. Young Schlenk flask, equipped with a magnetic stir bar and a J. Young valve, is charged successively with a solution of  $\text{Fe}(\text{acac})_2$  (3.2 mg) and  $\text{PP}_3$  (8.4 mg) in 1 mL of anhydrous THF, *N*-methylformanilide (**2a**) (31  $\mu\text{L}$ , 0.250 mmol), and phenylsilane (31  $\mu\text{L}$ , 0.250 mmol). The flask is sealed and stirred vigorously in an oil bath at 100  $^\circ\text{C}$  for 22 h. The corresponding *N,N*-dimethylaniline (**3a**) is identified and the yield and

conversion were determined by  $^1\text{H}$  NMR in  $\text{CDCl}_3$  and GC/MS using mesitylene as an internal standard, after calibration.

$^1\text{H}$  NMR and  $^{13}\text{C}$  NMR of the following formylated products are identical to reported data: **2h<sup>1</sup>**, **2l<sup>2</sup>**, **2s<sup>3</sup>**, **2t<sup>4</sup>**, **3x<sup>5</sup>**, **2m'<sup>6</sup>**, **2o<sup>7</sup>**, **2y<sup>8</sup>**, **2x<sup>9</sup>**.

$^1\text{H}$  NMR and  $^{13}\text{C}$  NMR of the following products were compared with commercial samples purchased from Aldrich or Acros: **2a**, **2b**, **2c**, **2d**, **2e**, **2i**, **2j**, **2k**, **2m**, **2n**, **2u**, **3a**, **3y**.

Selected data for **2v**:

$^1\text{H}$  NMR ( $\text{CDCl}_3$ )  $\delta$ : 9.45 (d,  $J = 10\text{Hz}$ , 0.5 H), 8.99 (s, 1H), 8.85 (d,  $J = 10\text{ Hz}$ , 0.5H), 8.40 (s, 1H), 7.85-8.06 (m, 4H), 7.65 (d,  $J = 8\text{ Hz}$ , 2H), 7.15 (d,  $J = 8\text{ Hz}$ , 1H), 4.24 (t, 4H), 1.56-1.78 (m, 4H), 1.51-1.26 (m, 4H), 0.92 (t, 6H).

$^{13}\text{C}$  NMR ( $\text{CDCl}_3$ )  $\delta$ : 166.36, 166.14, 162.54, 159.94, 141.43, 141.25, 131.36, 130.71, 126.60, 126.08, 119.21, 117.12, 64.91, 30.65, 19.19, 13.70.

GC/MS: IE (m/z): 221 ( $\text{M}^+$ , 12); 165 (100); 148 (80); 137 (35); 93 (100); 120 (52)

Selected data for **2r**:

$^1\text{H}$  NMR ( $\text{CDCl}_3$ )  $\delta$ : 13.25 (br, 1H), 8.30 (s, 0.6H), 7.92 (s, 0.4H), 3.37-2.62 (m, 8H), 2.53 (s, 3H).

$^{13}\text{C}$  NMR ( $\text{CDCl}_3$ )  $\delta$ : 165.58, 158.99, 54.60, 53.22, 43.97.

GC/MS: IE (m/z): 143 ( $\text{M}^+$ , 7); 128 (3); 115 (5); 99 (100)

**Complete table for the optimization of the iron-based catalytic system:**

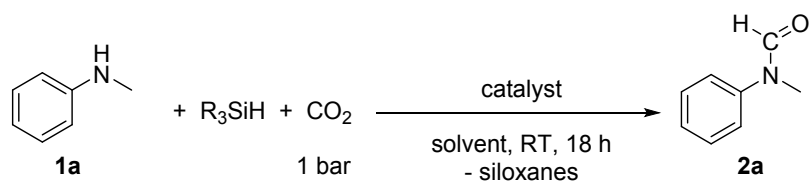

| Entry <sup>[a]</sup> | Catalyst (mol%)                                                                    | Solvent                         | Hydrosilane (eq)                       | Conversion <sup>[b]</sup> (%) |
|----------------------|------------------------------------------------------------------------------------|---------------------------------|----------------------------------------|-------------------------------|
| 1                    | Fe(acac) <sub>2</sub> (5.0) + PP <sub>3</sub> (5.0)                                | THF                             | PhSiH <sub>3</sub> (1)                 | > 95                          |
| 2                    | Fe(acac) <sub>2</sub> (5.0)                                                        | THF                             | PhSiH <sub>3</sub> (1)                 | <1                            |
| 3                    | PP <sub>3</sub> (5.0)                                                              | THF                             | PhSiH <sub>3</sub> (1)                 | <1                            |
| 4                    | Fe(acac) <sub>2</sub> (5.0) + PPh <sub>3</sub> (20.0)                              | THF                             | PhSiH <sub>3</sub> (1)                 | <1                            |
| 5                    | Fe(acac) <sub>2</sub> (5.0) + dppp (10.0)                                          | THF                             | PhSiH <sub>3</sub> (1)                 | <1                            |
| 6                    | Fe(acac) <sub>2</sub> (5.0) + dppf (10.0)                                          | THF                             | PhSiH <sub>3</sub> (1)                 | <1                            |
| 7                    | Fe(acac) <sub>2</sub> (5.0) + dppBz (10.0)                                         | THF                             | PhSiH <sub>3</sub> (1)                 | <1                            |
| 8                    | Fe(acac) <sub>2</sub> (5.0) + XantPhos (10.0)                                      | THF                             | PhSiH <sub>3</sub> (1)                 | <1                            |
| 9                    | Fe(acac) <sub>2</sub> (5.0) + tmeda (10.0)                                         | THF                             | PhSiH <sub>3</sub> (1)                 | <1                            |
| 10                   | Fe(BF <sub>4</sub> ) <sub>2</sub> ·6H <sub>2</sub> O (5.0) + PP <sub>3</sub> (5.0) | THF                             | PhSiH <sub>3</sub> (1)                 | 13                            |
| 11                   | Fe(acac) <sub>2</sub> (5.0) + PP <sub>3</sub> (5.0)                                | CH <sub>3</sub> CN              | PhSiH <sub>3</sub> (1)                 | > 95                          |
| 12                   | Fe(acac) <sub>2</sub> (5.0) + PP <sub>3</sub> (5.0)                                | CH <sub>2</sub> Cl <sub>2</sub> | PhSiH <sub>3</sub> (1)                 | > 95                          |
| 13                   | Fe(acac) <sub>2</sub> (5.0) + PP <sub>3</sub> (5.0)                                | toluene                         | PhSiH <sub>3</sub> (1)                 | 63                            |
| 14                   | Fe(acac) <sub>2</sub> (5.0) + PP <sub>3</sub> (5.0)                                | 1,4-dioxane                     | PhSiH <sub>3</sub> (1)                 | 48                            |
| 15                   | Fe(acac) <sub>2</sub> (5.0) + PP <sub>3</sub> (5.0)                                | THF                             | Et <sub>3</sub> SiH (3)                | <1                            |
| 16                   | Fe(acac) <sub>2</sub> (5.0) + PP <sub>3</sub> (5.0)                                | THF                             | (EtO) <sub>3</sub> SiH (3)             | <1                            |
| 17                   | Fe(acac) <sub>2</sub> (5.0) + PP <sub>3</sub> (5.0)                                | THF                             | Et <sub>2</sub> SiH <sub>2</sub> (1.5) | <1                            |
| 18                   | Fe(acac) <sub>2</sub> (5.0) + PP <sub>3</sub> (5.0)                                | THF                             | Ph <sub>2</sub> SiH <sub>2</sub> (1.5) | <1                            |
| 19                   | Fe(acac) <sub>2</sub> (5.0) + PP <sub>3</sub> (5.0)                                | THF                             | TMDS (3)                               | <1                            |
| 20                   | Fe(acac) <sub>2</sub> (5.0) + PP <sub>3</sub> (5.0)                                | THF                             | PMHS (3)                               | <1 <sup>[d]</sup>             |
| 21                   | Fe(acac) <sub>2</sub> (1) + PP <sub>3</sub> (1)                                    | THF                             | PhSiH <sub>3</sub> (1)                 | 28                            |
| 22                   | Fe(acac) <sub>2</sub> (0.1) + PP <sub>3</sub> (0.1)                                | THF                             | PhSiH <sub>3</sub> (1)                 | <1                            |

PP<sub>3</sub>: tris[2-(diphenylphosphino)ethyl]phosphine  
 dppp: 1,3-bis(diphenylphosphino)propane  
 dppf: 1,1'-bis(diphenylphosphino)ferrocene  
 dppBz: 1,2-bis(diphenylphosphino)benzene  
 XantPhos: 4,5-bis(diphenylphosphino)-9,9-dimethylxanthene  
 tmeda: *N,N,N',N'*-tetramethylethylenediamine

## **References:**

1. T. B.Nguyen, J. Sorres, M. Q. Tran, L. Ermolenko and A. Al-Mourabit, *Org. Lett.*, 2012, **14**, 3202-3205.
2. S. Nageswara Rao, D. C. Mohan and S. Adimurthy, *Org. Lett.*, 2013, **15**, 1496-1499.
3. O. Jacquet, C. Das Neves Gomes, M. Ephritikhine and T. Cantat, *J. Am. Chem. Soc.*, 2012, **134**, 2934-2937.
4. W. Wener and P. Depreux, *J. Chem. Res., Miniprint*, 1980, **11**, 4513-4521.
5. L. Huang , X. Zhang and Y. Zhang, *Org. Lett.*, 2009, **11**, 3730-3733.
6. H. Yinglin and H. Hongwen, *Synthesis*, 1990, **2**, 122-124.
7. K.B. Berst, B.V. Plapp and J.F. Schindler, *J. Med. Chem.*, 1998, **41**, 1696-1701.
8. W. Han, P. Mayer and A.R. Ofial, *Adv. Synth. Catal.*, 2010, **352**, 1667-1676.
9. X. He,T.L. Lau, H. Liu, D.P. Phillips, K. Yang and X-F. Zhu, *Tetrahedron Lett.*, 2009, **50**, 7293-7296.
